# Supplementary material for: Recyclable fluorescence sensing based on copper clusters for simultaneous determination of copper ions and ammonia
Source: Royal Society of Chemistry journal article supplement (doi:10.1039/d3an00043e), 2023-01-01
Supplement: d3an00043e1.pdf [file d3an00043e1.pdf]

## Supporting information

Recyclable fluorescence sensing based on copper clusters for simultaneous determination of copper ions and ammonia

Jie Zou<sup>a,b</sup>, Fujian Xu<sup>a,b</sup>, Jishi Zheng<sup>a,b</sup>, Yuhao Xiang<sup>a,b</sup>, Mengtian Li<sup>a,b</sup>,  
Qinghan Zhou<sup>a,b</sup>, Hui Xia<sup>a,b\*</sup>

<sup>a</sup> Key Laboratory of Pollution Control Chemistry and Environmental Functional Materials for Qinghai-Tibet Plateau of the National Ethnic Affairs Commission, School of Chemistry and Environment, Southwest Minzu University, Chengdu 610041, China;

<sup>b</sup> Key Laboratory of General Chemistry of the National Ethnic Affairs Commission, School of Chemistry and Environment, Southwest Minzu University, Chengdu 610041, China.

\* Corresponding author at: School of Chemistry and Environment, Southwest Minzu University, Chengdu, Sichuan 610041, China.

E-mail address: [ivyxiahui@swun.edu.cn](mailto:ivyxiahui@swun.edu.cn) (H. Xia).

**Table S1** The comparison of the proposed method and other conventional methods.

| Analyte          | Method                         | Conditions                                            | LOD                    | Ref.        |
|------------------|--------------------------------|-------------------------------------------------------|------------------------|-------------|
| Cu <sup>2+</sup> | UV-vis spectrophotometry       | Pyrene based sensor;<br>Acetonitrile medium           | $2.5 \times 10^{-6}$ M | 33          |
|                  | Fluorescence spectrophotometry | Coumarin-based probes;<br>1% DMSO                     | $1.0 \times 10^{-4}$ M | 34          |
|                  | Fluorescence spectrophotometry | L- cysteine; aqueous solution                         | $6.0 \times 10^{-5}$ M | This method |
| NH <sub>3</sub>  | Colorimetric assays            | Polyaniline films; 30 °C                              | $5.9 \times 10^{-4}$ M | 35          |
|                  | Optical sensor                 | Co <sup>2+</sup> ion solution; buffer system of pH 13 | $1.6 \times 10^{-2}$ M | 36          |
|                  | Fluorescence spectrophotometry | Cu clusters; aqueous solution                         | $4.1 \times 10^{-4}$ M | This method |

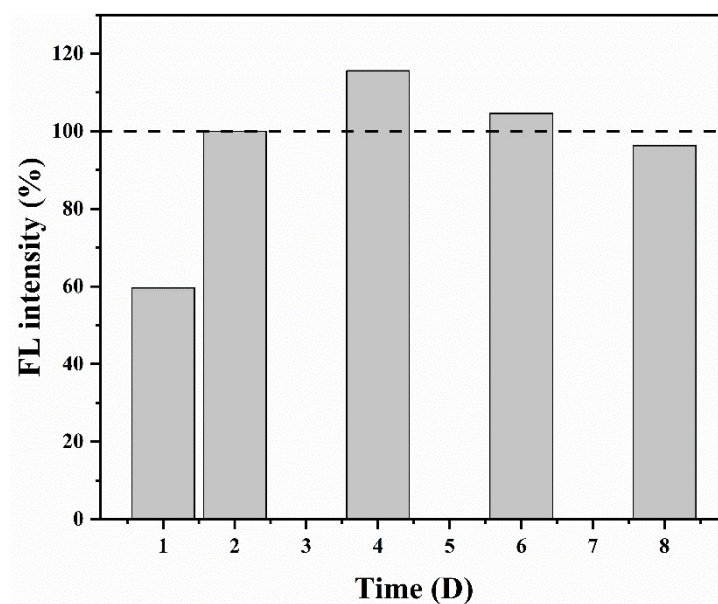**Fig. S1** Stability of the Cu clusters.

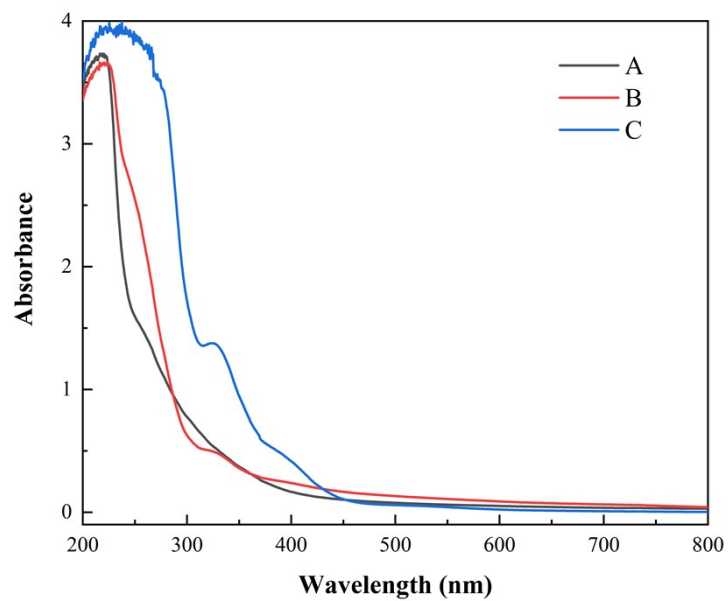

**Fig. S2** UV-vis spectra of Cu clusters (A), Cu clusters reacted with ammonia (B) and Cu clusters reacted with NaOH (C).
